# Supplementary material for: Application of respiratory metagenomics for COVID-19 patients on the intensive care unit to inform appropriate initial antimicrobial treatment and rapid detection of nosocomial transmission
Source: bioRxiv or medRxiv preprint supplement (doi:10.1101/2020.11.26.20229989), 2020-12-03
Supplement: Supplementary file [file media-1.pdf]

## Supplementary Figures:

### Supplementary Figure 1. Post mortem histological analysis of focal invasive pulmonary aspergillosis

(IPA). A. Focus of invasive aspergillosis in the left lower lobe involving a large vessel with surrounding lung showing diffuse alveolar damage (approximately 1cm x 1cm) (Haematoxylin & Eosin x 12). B. This was a single focus identified from ten 3 x 2cm sections of lung. B. Focal invasive aspergillosis was identified microscopically at post-mortem (Grocott silver stain x 100).

## Tables:

**Supplementary Table 1.** Proportion of patients with different *Klebsiella spp.* in respiratory and blood cultures and their acquired resistance phenotypes impacting on guideline recommendations.

**Supplementary Table 2A.** Sequencing metadata for all respiratory samples processed with clinical metagenomics.

**Supplementary Table 2B.** Negative controls run with each batch of samples sequenced.

**Supplementary Table 3.** Phenotypic resistance reported by culture and resistance genes reported by clinical metagenomics in all culture-positive samples after 2 hours of sequencing.

**Supplementary Table 4.** Microbiology, PCR and clinical metagenomics results for all samples processed in this study for the identification of *Aspergillus fumigatus*.

**Supplementary Table 5.** *Klebsiella pneumoniae* and *Corynebacterium striatum* alignment for outbreak analysis. (A) Number of SNPs between each sample of *Corynebacterium striatum*. (B) Number of SNPs between each sample of *K. pneumoniae*, (C) the 7 predicted gene multi-locus sequence types for each sample against the *K. pneumoniae* database (numbers in each gene column refer to the allele - a ~ indicates a full length allele similar to the given allele but less than 100% identity) and (D) number of SNPs analysis in between the two identical CMg samples and two epidemiologically linked *K. pneumoniae* isolates.

**Supplementary Table 6.** All organisms identified in all respiratory samples processed with clinical metagenomics (above pre-defined thresholds<sup>a</sup>).

**Supplementary Table 1.** Proportion of patients with different *Klebsiella spp.* in respiratory and blood cultures and their acquired resistance phenotypes impacting on guideline recommendations

| <i>Klebsiella spp.</i> identified        | Number in respiratory tract (%) | Acquired $\beta$ -lactam Resistance | Acquired resistance phenotypes (number) | Number in blood (% <sup>f</sup> ) |
|------------------------------------------|---------------------------------|-------------------------------------|-----------------------------------------|-----------------------------------|
| <i>K. pneumoniae</i>                     | 51 <sup>a</sup>                 | 32 (63%)                            | ESBL + AGR (13)                         | 3 (23%)                           |
|                                          |                                 |                                     | Other: non-ESBL + AGS <sup>d</sup> (16) | 6 (30%)                           |
|                                          |                                 |                                     | Other: AGS <sup>e</sup> (4)             | 0                                 |
|                                          |                                 |                                     | None (28)                               | 3 (11%)                           |
| <i>K. aerogenes</i>                      | 37 <sup>a</sup>                 | 0 <sup>c</sup>                      | N/A                                     | 5 (14%)                           |
| Other <i>Klebsiella spp</i> <sup>b</sup> | 6                               | 1                                   | N/A                                     | 2 <sup>g</sup> (33%)              |

<sup>a</sup> Includes 6 patients with *K. pneumoniae* and *K. aerogenes* in respiratory specimens at different times. Where total numbers in different columns or rows differ this is due to co-infection with different *Klebsiella spp.* or their resistance phenotypes at some time during ICU stay.

<sup>b</sup> 5 *K. oxytoca* and 1 *K. variicola*

<sup>c</sup> *K. aerogenes* intrinsic resistance to co-amoxiclav and piperacillin-tazobactam

<sup>d</sup> 14 resistant to co-amoxiclav and piperacillin-tazobactam and 6 others

<sup>e</sup> Co-amoxiclav susceptible but with resistance to second or third generation cephalosporins)

<sup>f</sup> % = Number of patients with *Klebsiella* BSI/number with *Klebsiella* in respiratory tract.

<sup>g</sup> 1 *K. oxytoca* with no acquired resistance and 1 *K. variicola* with resistance to co-amoxiclav and piperacillin-tazobactam

AGR = aminoglycoside resistance. AGS =aminoglycoside susceptible

**Supplementary Table 2A.** Sequencing metadata for all respiratory samples processed with clinical metagenomics.

| Sample ID          | Human reads | Microbial classified reads | Unclassified reads | Microbial reads | Number of raw reads from 2hrs | Metagenomics output                      | Classified reads of reported pathogens after chosen thresholds <sup>a</sup> |
|--------------------|-------------|----------------------------|--------------------|-----------------|-------------------------------|------------------------------------------|-----------------------------------------------------------------------------|
| S1 <sup>N3</sup>   | 2,805       | 144,220                    | 975                | 145195          | 148,000                       | <i>K. aerogenes</i>                      | 138,626                                                                     |
| S5 <sup>N3</sup>   | 16          | 0                          | 0                  | 0               | 16                            | Negative                                 | 0                                                                           |
| S8 <sup>N5</sup>   | 736         | 579                        | 820                | 1,399           | 2135                          | <i>A. fumigatus</i><br><i>K. oxytoca</i> | 77<br>44                                                                    |
| S10 <sup>N5</sup>  | 4,118       | 74,891                     | 459                | 75,350          | 79,468                        | <i>K. pneumoniae</i>                     | 69,029                                                                      |
| S11 <sup>N5</sup>  | 39,675      | 28,473                     | 7,195              | 35,668          | 68,148                        | <i>K. pneumoniae</i>                     | 16,828                                                                      |
| S14 <sup>N6</sup>  | 3,795       | 195                        | 10                 | 205             | 4000                          | Negative                                 | 0                                                                           |
| S16 <sup>N6</sup>  | 8,308       | 42,269                     | 1,423              | 43,692          | 52,000                        | <i>S. aureus</i>                         | 1,768                                                                       |
| S17 <sup>N7</sup>  | 6,095       | 1790                       | 115                | 1,905           | 8000                          | <i>P. aeruginosa</i>                     | 1,457                                                                       |
| S18 <sup>N6</sup>  | 17,224      | 19,478                     | 3,298              | 22,776          | 40,000                        | Negative                                 | 0                                                                           |
| S19 <sup>N6</sup>  | 37,629      | 6,866                      | 3,505              | 10,371          | 48,000                        | Negative                                 | 0                                                                           |
| S20 <sup>N7</sup>  | 21,292      | 38,361                     | 347                | 38,708          | 60,000                        | <i>S. aureus</i>                         | 36,281                                                                      |
| S21 <sup>N6</sup>  | 134         | 75,112                     | 754                | 75,866          | 76000                         | <i>E. cloacae</i>                        | 62,314                                                                      |
| S25 <sup>N15</sup> | 62,587      | 1325                       | 88                 | 1,413           | 64,000                        | Negative                                 | 0                                                                           |
| S27 <sup>N11</sup> | 11,214      | 4,238                      | 548                | 4,786           | 16,000                        | Negative                                 | 0                                                                           |
| S28 <sup>N11</sup> | 87,316      | 43,293                     | 1,391              | 44,684          | 132000                        | <i>S. aureus</i><br><i>A. fumigatus</i>  | 3,165<br>2,649                                                              |
| S29 <sup>N10</sup> | 1108        | 439                        | 320                | 759             | 1867                          | Negative                                 | 0                                                                           |
| S30 <sup>N10</sup> | 200         | 91                         | 136                | 227             | 307                           | Negative                                 | 0                                                                           |
| S31 <sup>N10</sup> | 200         | 31,233                     | 567                | 31,800          | 32,000                        | <i>K. pneumoniae</i>                     | 28,056                                                                      |
| S33 <sup>N10</sup> | 16,179      | 981                        | 195                | 1,176           | 17,355                        | Negative                                 | 0                                                                           |

|                    |        |         |        |         |         |                                                                               |                        |
|--------------------|--------|---------|--------|---------|---------|-------------------------------------------------------------------------------|------------------------|
| S34 <sup>N10</sup> | 27,481 | 76,803  | 5,993  | 82,796  | 110,277 | <i>K. pneumoniae</i>                                                          | 38,758                 |
| S35 <sup>N10</sup> | 18     | 465     | 388    | 853     | 871     | <i>A. baumannii</i>                                                           | 99                     |
| S36 <sup>N8</sup>  | 119    | 117,999 | 1,882  | 119,881 | 120,000 | <i>S. aureus</i>                                                              | 109,767                |
| S37 <sup>N8</sup>  | 10,605 | 31,895  | 13,500 | 45,395  | 56,000  | <i>M. morgannii</i><br><i>K. pneumoniae</i><br><i>P. mirabilis</i>            | 28,300<br>876<br>397   |
| S39 <sup>N8</sup>  | 1,749  | 25804   | 447    | 26251   | 28,000  | <i>C. koseri</i><br><i>K. pneumoniae</i>                                      | 23,870<br>284          |
| S40 <sup>N11</sup> | 78     | 1024    | 133    | 1157    | 1235    | Negative                                                                      | 0                      |
| S41 <sup>N8</sup>  | 933    | 24,770  | 6,297  | 31,067  | 32,000  | <i>S. aureus</i>                                                              | 1,365                  |
| S42 <sup>N8</sup>  | 449    | 45474   | 6,077  | 51551   | 52,000  | <i>Burkholderia spp.</i>                                                      | 34,347                 |
| S44 <sup>N13</sup> | 2,922  | 63,370  | 1,708  | 65,078  | 68,000  | <i>S. marcesens</i><br><i>C. freundii</i><br><i>K. aerogenes</i> <sup>b</sup> | 53,082<br>6,082<br>173 |
| S45 <sup>N16</sup> | 12,239 | 13,256  | 2,505  | 15,761  | 28,000  | <i>C. striatum</i><br><i>K. aerogenes</i> <sup>b</sup>                        | 8,665<br>104           |
| S46 <sup>N13</sup> | 766    | 300     | 162    | 462     | 1,228   | <i>C. koseri</i>                                                              | 237                    |
| S49 <sup>N13</sup> | 33,798 | 2,070   | 132    | 2,202   | 36,000  | <i>K. pneumoniae</i>                                                          | 594                    |
| S50 <sup>N13</sup> | 5,845  | 10,005  | 150    | 10,155  | 16,000  | Negative                                                                      | 0                      |
| S51 <sup>N14</sup> | 87,418 | 8,342   | 240    | 8,582   | 96,000  | <i>S. aureus</i><br><i>C. koseri</i>                                          | 5,203<br>2,262         |
| S52 <sup>N7</sup>  | 49,146 | 37,875  | 979    | 38,854  | 88,000  | <i>K. aerogenes</i><br><i>C. striatum</i>                                     | 5,277<br>24,347        |
| S53 <sup>N15</sup> | 24     | 0       | 0      | 0       | 24      | Negative                                                                      | 0                      |
| S54 <sup>N14</sup> | 8,985  | 2,698   | 317    | 3,015   | 12,000  | <i>C. striatum</i>                                                            | 1,758                  |
| S55 <sup>N11</sup> | 26,854 | 8,724   | 422    | 9,146   | 36,000  | <i>A. fumigatus</i>                                                           | 16                     |

|                    |        |         |        |         |         |                                                                 |                         |
|--------------------|--------|---------|--------|---------|---------|-----------------------------------------------------------------|-------------------------|
| S56 <sup>N11</sup> | 3,342  | 36,278  | 380    | 36,658  | 40,000  | <i>P. mirabilis</i><br><i>A. fumigatus</i>                      | 11,323<br>79            |
| S59 <sup>N14</sup> | 542    | 117,780 | 1,678  | 119,458 | 120,000 | <i>K. pneumoniae</i><br><i>C. striatum</i>                      | 99,186<br>8,478         |
| S61 <sup>N15</sup> | 76     | 47,159  | 765    | 47,924  | 48,000  | <i>C. koseri</i><br><i>K. pneumoniae</i><br><i>P. mirabilis</i> | 29,797<br>14,118<br>815 |
| S62 <sup>N14</sup> | 10,979 | 920     | 101    | 1,021   | 12,000  | <i>K. aerogenes</i><br><i>C. striatum</i>                       | 184<br>227              |
| S63 <sup>N15</sup> | 621    | 141,567 | 5,812  | 147,379 | 148,000 | <i>C. striatum</i><br><i>K. pneumoniae</i>                      | 89,166<br>17,034        |
| S64 <sup>N16</sup> | 3,516  | 19,652  | 4,832  | 24,484  | 28,000  | Negative                                                        | 0                       |
| S65 <sup>N16</sup> | 26,010 | 32,859  | 13,131 | 45,990  | 72,000  | Negative                                                        | 0                       |

<sup>a</sup>Pre-defined thresholds:  $\geq 1\%$  microbial classified,  $>2503$  alignment score and barcode cross-talk rule applied.

<sup>b</sup>Pathogens identified but were not above pre-defined thresholds

**Supplementary Table 2B.** Negative controls run with each batch of samples sequenced.

| Control number | Human reads | Microbial classified reads | Unclassified reads | Number of reads minus hg38 | Number of raw reads from 2hrs | Pathogen identified by metagenomics                                  | Pathogen classified reads after 2hrs of sequencing |
|----------------|-------------|----------------------------|--------------------|----------------------------|-------------------------------|----------------------------------------------------------------------|----------------------------------------------------|
| N3             | 35          | 0                          | 0                  | 0                          | 35                            | <i>K. aerogenes</i><br><i>M. catarrhalis</i><br><i>P. aeruginosa</i> | 23<br>6<br>5                                       |
| N5             | 2           | 136                        | 112                | 248                        | 250                           | <i>E. coli</i><br><i>K. pneumoniae</i>                               | 9<br>4                                             |
| N6             | 2946        | 898                        | 156                | 1054                       | 4,000                         | <i>E. coli</i>                                                       | 76                                                 |
| N7             | 0           | 0                          | 9                  | 0                          | 9                             | -                                                                    | 0                                                  |
| N8             | 414         | 89                         | 10                 | 99                         | 513                           | <i>E. coli</i><br><i>S. aureus</i>                                   | 9<br>4                                             |
| N10            | 5812        | 1599                       | 288                | 1887                       | 7699                          | <i>E. coli</i><br><i>K. pneumoniae</i>                               | 390<br>20                                          |
| N11            | 238         | 1234                       | 114                | 1348                       | 1586                          | <i>E. coli</i><br><i>H. influenzae</i><br><i>K. pneumoniae</i>       | 290<br>14<br>11                                    |
| N13            | 41,567      | 2,420                      | 13                 | 2,433                      | 44,000                        | <i>E. coli</i><br><i>C. striatum</i>                                 | 63<br>7                                            |
| N14            | 15          | 402                        | 63                 | 465                        | 480                           | <i>E. coli</i><br><i>K. pneumoniae</i>                               | 37<br>15                                           |
| N15            | 56          | 80                         | 8642               | 6942                       | 6998                          | <i>E. coli</i><br><i>C. striatum</i><br><i>K. pneumoniae</i>         | 13<br>3<br>9                                       |
| N16            | 1248        | 480                        | 0                  | 480                        | 1728                          | -                                                                    | 0                                                  |

**Supplementary Table 3.** Phenotypic resistance reported by culture and resistance genes reported by clinical metagenomics in all culture-positive samples after 2 hours of sequencing.

| Sample number | Pathogen identified by culture | Reported phenotypic resistance <sup>a</sup>                                         | AMR genes reported by metagenomic sequencing                                                                                                                                                                                                   |
|---------------|--------------------------------|-------------------------------------------------------------------------------------|------------------------------------------------------------------------------------------------------------------------------------------------------------------------------------------------------------------------------------------------|
| S1            | <i>K. aerogenes</i>            | Amoxicillin<br>Co-amoxiclav<br>Cefuroxime<br>Ceftazidime<br>Pireracillin/Tazobactam | ND                                                                                                                                                                                                                                             |
| S8            | <i>A. fumigatus</i>            | ND                                                                                  | ND                                                                                                                                                                                                                                             |
| S10           | <i>K. pneumoniae</i>           | Amoxicillin                                                                         | <i>oqcA_1</i><br><i>fosA_5</i>                                                                                                                                                                                                                 |
| S11           | <i>K. pneumoniae</i>           | Amoxicillin                                                                         | <i>oqxB_1</i><br><i>oqcA_1</i><br><i>fosA5_1</i><br><i>fosA_6</i><br><i>fosA_5</i><br><i>fosA_5</i><br><i>oqcA_1</i>                                                                                                                           |
| S17           | <i>P. aeruginosa</i>           | Sensitive                                                                           | ND                                                                                                                                                                                                                                             |
| S20           | <i>S. aureus</i>               | Penicillin<br>Erythromycin<br>Fusidic acid                                          | <i>fusB_1</i><br><i>fosD_1</i><br><i>aadD_1</i><br><i>erm(T)_2</i>                                                                                                                                                                             |
| S21           | <i>E. cloacae</i>              | Ampicillin                                                                          | <i>fosA_1</i><br><i>fosA_7</i>                                                                                                                                                                                                                 |
| S28           | <i>Aspergillus</i>             | ND                                                                                  | ND                                                                                                                                                                                                                                             |
| S31           | <i>K. pneumoniae</i>           | ESBL<br>Ciprofloxacin<br>Penicillins<br>Septrin<br>Amoxicillin                      | <i>aph(6)-ld_1</i><br><i>oqxB_1</i><br><i>aph(3'')-lb_5</i><br><i>blaOXA-1_1</i><br><i>dfrA14_1</i><br><i>oqcA_1</i><br><i>fosA6_1</i><br><i>sul2_2</i><br><i>blaTEM-1B_1</i><br><i>blaSHV-28_1</i><br><i>sul2_15</i><br><i>blaCTX-M-103_1</i> |
| S34           | <i>K. pneumoniae</i>           | Amoxicillin                                                                         | <i>oqxB_1</i> <i>aph(3'')-la_5</i><br><i>blaTEM-168_1</i><br><i>fosA_3</i><br><i>tet(W)_4</i><br><i>blaSHV-108_1</i>                                                                                                                           |
| S35           | <i>A. baumannii</i>            | Co-amoxiclav<br>Cefuroxime                                                          | No genes                                                                                                                                                                                                                                       |

|     |                       |                                                                                                      |                                                                                                                        |
|-----|-----------------------|------------------------------------------------------------------------------------------------------|------------------------------------------------------------------------------------------------------------------------|
|     |                       | Piperacillin/Tazocin<br>Cefpodoxime<br>Cefoxitin                                                     |                                                                                                                        |
| S36 | <i>S. aureus</i>      | Penicillin,<br>Erythromycin<br>Ciprofloxacin<br>Trimethoprim                                         | <i>ermC_13</i><br><i>ermC_1</i><br><i>ermC_10</i><br><i>ermC_2</i><br><i>ermC_12</i><br><i>dfrG_1</i>                  |
| S37 | <i>P. mirabilis</i>   | Sensitive                                                                                            | <i>aac(3)-IId_1</i><br><i>blaOXA-1_1</i><br><i>dfrA17_1</i><br><i>aadA5_1</i>                                          |
|     | <i>M. morganni</i>    | Gentamicin<br>Cephalosporin<br>Septrin<br>Ciprofloxacin<br>Trimethoprim<br>Fosfomycin                | <i>sul1_2</i><br><i>aac(3)-IId_1</i><br><i>blaOXA-1_1</i><br><i>dfrA17_1</i><br><i>aadA5_1</i><br><i>blaDHA-1_1</i>    |
| S39 | <i>C. koseri</i>      | Amoxicillin                                                                                          | <i>BlaCKO-1_1</i><br><i>blaMAL-1_2</i>                                                                                 |
| S42 | <i>B. cenocepacia</i> | Gentamicin<br>Amikacin                                                                               | ND                                                                                                                     |
| S44 | <i>S. marcesens</i>   | Amoxicillin<br>Co-amoxiclav<br>Cefuroxime<br>Cotrimoxazole<br>Piperacillin/Tazobactam<br>Ceftazidime | <i>aac(6')-Ic_1</i><br><i>blaSRT-1_1</i>                                                                               |
|     | <i>K. aerogenes</i>   | Amoxicillin<br>Co-amoxiclav<br>Cefuroxime<br>Piperacillin/Tazobactam<br>Ceftazidime                  | ND                                                                                                                     |
| S45 | <i>C. striatum</i>    | ND                                                                                                   | ND                                                                                                                     |
| S46 | <i>C. koseri</i>      | Amoxicillin                                                                                          | ND                                                                                                                     |
| S49 | <i>K. pneumoniae</i>  | Ciprofloxacin<br>ESBL                                                                                | <i>blaTEM-168_1</i><br><i>blaTEM-176_1</i>                                                                             |
| S51 | <i>S. aureus</i>      | Penicillin,<br>Erythromycin                                                                          | <i>ermC_13</i><br><i>ermT_2</i><br><i>fusB_1</i><br><i>blaTEM-171_1</i>                                                |
|     | <i>C. koseri</i>      | Amoxicillin                                                                                          | <i>blaCKO-1_1</i>                                                                                                      |
| S52 | <i>K. aerogenes</i>   | Penicillin<br>Cephalosporin                                                                          | <i>aac(6')-Ib_1</i>                                                                                                    |
| S54 | <i>C. striatum</i>    | Penicillin<br>Ciprofloxacin<br>Clindamycin                                                           | ND                                                                                                                     |
| S56 | <i>P. mirabilis</i>   | Amoxicillin<br>Septrin                                                                               | <i>aac(6')-aph(2'')_1</i><br><i>blaTEM-1B_1</i><br><i>tet(J)_2</i><br><i>erm(B)_18</i>                                 |
|     | <i>A. fumigatus</i>   | ND                                                                                                   | ND                                                                                                                     |
| S59 | <i>K. pneumoniae</i>  | Penicillin<br>Cephalosporin<br>Septrin<br>Ciprofloxacin                                              | <i>aph(6)-Id_1</i><br><i>oqx_B_1</i><br><i>aph(3'')-Ib_5</i><br><i>blaOXA-1_1</i><br><i>dfrA14_1</i><br><i>oqx_A_1</i> |



|     |                      |                                                                                                    |                                                                                                                                                                                                                                                  |
|-----|----------------------|----------------------------------------------------------------------------------------------------|--------------------------------------------------------------------------------------------------------------------------------------------------------------------------------------------------------------------------------------------------|
|     |                      |                                                                                                    | <i>fosA6_1</i><br><i>sul2_2</i><br><i>blaTEM-1B_1</i><br><i>blaSHV-28_1</i><br><i>sul2_15</i><br><i>blaSHV-106_1</i><br><i>sul1_2</i><br><i>tet(A)_4</i><br><i>aac(6')-Ib_1</i><br><i>fosA_3</i><br><i>blaTEM-122_1</i><br><i>blaCTX-M-106_1</i> |
|     | <i>C. striatum</i>   | Ciprofloxacin<br>Penicillin<br>Tetracycline<br>Clindamycin<br>Doxycycline                          | ND                                                                                                                                                                                                                                               |
| S61 | <i>P. mirabilis</i>  | Sensitive                                                                                          | No genes                                                                                                                                                                                                                                         |
|     | <i>K. pneumoniae</i> | Amoxicillin                                                                                        | <i>oqxA</i><br><i>oqxB</i>                                                                                                                                                                                                                       |
| S62 | <i>K. aerogenes</i>  | Amoxicillin<br>Co-Amoxiclav<br>Cefuroxime<br>Piperacillin/Tazobactam<br>Ceftazidime<br>Cefpodoxime | ND                                                                                                                                                                                                                                               |
|     | <i>C. striatum</i>   | Ciprofloxacin<br>Penicillin<br>Tetracycline<br>Clindamycin<br>Doxycycline                          | ND                                                                                                                                                                                                                                               |
| S63 | <i>K. pneumoniae</i> | Co-amoxiclav<br>Tazocin                                                                            | <i>sul1_2</i><br><i>aac(6')-Ib</i><br><i>fosA6</i><br><i>aph(6)-IId</i><br><i>blaSHV-27</i>                                                                                                                                                      |
|     | <i>C. striatum</i>   | ND                                                                                                 | ND                                                                                                                                                                                                                                               |

<sup>a</sup>Intrinsic and acquired phenotypic resistance reported by culture, ND=Not Done

**Supplementary Table 4.** Microbiology, PCR and clinical metagenomics results for all samples processed in this study for the identification of *Aspergillus fumigatus*

| Patient | Respiratory samples |                                               |                                              |                                                          | Galactomannan<br>(Positive/Tested) |             |
|---------|---------------------|-----------------------------------------------|----------------------------------------------|----------------------------------------------------------|------------------------------------|-------------|
|         | Sample Number       | Organism identified by metagenomic sequencing | <i>Aspergillus fumigatus</i> qPCR assay (Cq) | <i>Aspergillus</i> Respiratory Culture (Positive/Tested) | BAL > 1.0                          | Serum > 0.5 |
| 26      | S35                 | Negative                                      | >40                                          | Negative                                                 |                                    |             |
|         | Other               | Not done                                      | Not done                                     | 0 / 1                                                    | 0 / 1                              | 0 / 1       |
| 100     | S39                 | Negative                                      | >40                                          | Negative                                                 |                                    |             |
|         | Other               | Not done                                      | Not done                                     | 0 / 5                                                    | 0 / 1                              | 0 / 0       |
| 121     | S37                 | Negative                                      | >40                                          | Negative                                                 |                                    |             |
|         | Other               | Not done                                      | Not done                                     | 0 / 5                                                    | 0 / 0                              | 0 / 0       |
| 177     | S36                 | Negative                                      | >40                                          | Negative                                                 |                                    |             |
|         | Other               | Not done                                      | Not done                                     | 0 / 4                                                    | 0 / 0                              | 0 / 1       |
| 196     | S42                 | Negative                                      | >40                                          | Negative                                                 |                                    |             |
|         | Other               | Not done                                      | Not done                                     | 0 / 2                                                    | 0 / 0                              | 0 / 0       |
| 400     | S49                 | Negative                                      | >40                                          | Negative                                                 |                                    |             |
|         | Other               | Not done                                      | Not done                                     | 0 / 3                                                    | 0 / 0                              | 0 / 1       |
| 408     | S21                 | Negative                                      | >40                                          | Negative                                                 |                                    |             |
|         | Other               | Not done                                      | Not done                                     | 0 / 3                                                    | 0 / 0                              | 0 / 0       |
| 441     | S51                 | Negative                                      | >40                                          | Negative                                                 |                                    |             |
|         | S20                 | Negative                                      | >40                                          | Negative                                                 |                                    |             |
|         | Other               | Not done                                      | Not done                                     | 0 / 4                                                    | 0 / 0                              | 0 / 1       |
| 550     | S10                 | Negative                                      | >40                                          | Negative                                                 |                                    |             |
|         | Other               | Not done                                      | Not done                                     | 0 / 7                                                    | 0 / 0                              | 0 / 2       |
| 563     | S28                 | Positive                                      | 31                                           | Positive                                                 |                                    |             |
|         | Other               | Not done                                      | Not done                                     | 3 / 6                                                    | 0 / 1                              | 0 / 0       |
| 613     | S18                 | Negative                                      | >40                                          | Negative                                                 |                                    |             |
|         | Other               | Not done                                      | Not done                                     | 2 / 2                                                    | 1 / 1                              | 0 / 0       |
| 618     | S45                 | Negative                                      | >40                                          | Negative                                                 |                                    |             |
|         | Other               | Not done                                      | Not done                                     | 0 / 8                                                    | 0 / 0                              | 0 / 0       |
| 677     | S63                 | Negative                                      | >40                                          | Negative                                                 |                                    |             |
|         | S54                 | Negative                                      | >40                                          | Negative                                                 |                                    |             |
|         | S52                 | Negative                                      | >40                                          | Negative                                                 |                                    |             |
|         | Other               | Not done                                      | Not done                                     | 0 / 8                                                    | 2 / 2                              | 0 / 5       |
| 727     | S53                 | Negative                                      | >40                                          | Negative                                                 |                                    |             |
|         | Other               | Not done                                      | Not done                                     | 0 / 0                                                    | 0 / 0                              | 0 / 0       |
| 740     | S59                 | Negative                                      | >40                                          | Negative                                                 |                                    |             |
|         | S30                 | Negative                                      | >40                                          | Negative                                                 |                                    |             |
|         | Other               | Not done                                      | Not done                                     | 0 / 16                                                   | 1 / 4                              | 1 / 2       |

|      |       |          |          |          |       |       |
|------|-------|----------|----------|----------|-------|-------|
| 749  | S62   | Negative | >40      | Negative |       |       |
|      | S40   | Negative | >40      | Negative |       |       |
|      | Other | Not done | Not done | 0 / 8    | 0 / 1 | 0 / 1 |
| 815  | S46   | Negative | >40      | Negative |       |       |
|      | S25   | Negative | >40      | Negative |       |       |
|      | Other | Not done | Not done | 0 / 5    | 0 / 2 | 0 / 2 |
| 855  | S41   | Negative | >40      | Negative |       |       |
|      | Other | Not done | Not done | 0 / 6    | 0 / 0 | 0 / 0 |
| 872  | S61   | Negative | >40      | Negative |       |       |
|      | S11   | Negative | >40      | Negative |       |       |
|      | Other | Not done | Not done | 0 / 4    | 0 / 1 | 0 / 3 |
| 1033 | S8    | Positive | 33       | Positive |       |       |
|      | Other | Not done | Not done | 0 / 0    | 1 / 1 | 1 / 1 |
| 1036 | S5    | Negative | >40      | Negative |       |       |
|      | Other | Not done | Not done | 0 / 2    | 0 / 0 | 0 / 1 |
| 1054 | S31   | Negative | >40      | Negative |       |       |
|      | Other | Not done | Not done | 0 / 3    | 0 / 0 | 0 / 0 |
| 1065 | S19   | Negative | >40      | Negative |       |       |
|      | S16   | Negative | >40      | Negative |       |       |
|      | Other | Not done | Not done | 0 / 3    | 0 / 1 | 0 / 0 |
| 1069 | S17   | Negative | >40      | Negative |       |       |
|      | Other | Not done | Not done | 0 / 3    | 0 / 0 | 0 / 1 |
| 1082 | S14   | Negative | >40      | Negative |       |       |
|      | Other | Not done | Not done | 0 / 1    | 0 / 0 | 0 / 0 |
| 1092 | S27   | Negative | >40      | Negative |       |       |
|      | Other | Not done | Not done | 0 / 5    | 0 / 2 | 0 / 2 |
| 1262 | S29   | Negative | >40      | Negative |       |       |
|      | Other | Not done | Not done | 0 / 3    | 0 / 1 | 0 / 1 |
| 1292 | S44   | Negative | >40      | Negative |       |       |
|      | Other | Not done | Not done | 0 / 5    | 0 / 3 | 0 / 1 |
| 1346 | S56   | Positive | 32       | Positive |       |       |
|      | Other | Not done | Not done | 0 / 3    | 1 / 1 | 0 / 2 |
| 1440 | S33   | Negative | >40      | Negative |       |       |
|      | Other | Not done | Not done | 0 / 4    | 1 / 2 | 0 / 1 |
| 1457 | S65   | Negative | >40      | Negative |       |       |
|      | S64   | Negative | >40      | Negative |       |       |
|      | Other | Not done | Not done | 0 / 9    | 2 / 2 | 0 / 2 |
| 1503 | S1    | Negative | >40      | Negative |       |       |
|      | Other | Not done | Not done | 0 / 5    | 0 / 0 | 0 / 1 |
| 1512 | S34   | Negative | >40      | Negative |       |       |
|      | Other | Not done | Not done | 0 / 3    | 0 / 1 | 0 / 2 |
| 1583 | S55   | Positive | 31       | Negative |       |       |
|      |       |          |          |          |       |       |
|      | Other | Not done | Not done | 4 / 5    | 0 / 0 | 1 / 1 |

**Supplementary Table 5.** *Klebsiella pneumoniae* and *Corynebacterium striatum* alignment for outbreak analysis. (A) Number of SNPs between each sample of *Corynebacterium striatum*. (B) Number of SNPs between each sample of *K. pneumoniae*, (C) the 7 predicted gene multi-locus sequence types for each sample against the *K. pneumoniae* database (numbers in each gene column refer to the allele - a ~ indicates a full length allele similar to the given allele but less than 100% identity) and (D) number of SNPs analysis in between the two identical CMg samples and two epidemiologically linked *K. pneumoniae* isolates.

**A**

| Patient ID | Sample | S45 | S54 | S59 | S52 | S63 |
|------------|--------|-----|-----|-----|-----|-----|
| 618        | S45    | 0   | 61  | 115 | 92  | 102 |
| 677        | S54    | 61  | 0   | 122 | 89  | 97  |
| 740        | S59    | 115 | 122 | 0   | 157 | 157 |
|            | S52    | 92  | 89  | 157 | 0   | 30  |
|            | S63    | 102 | 97  | 157 | 30  | 0   |

**B**

| Patient ID | Sample | S10   | S11   | S31   | S34   | S59   | S63   | S61   |
|------------|--------|-------|-------|-------|-------|-------|-------|-------|
| 550        | S10    | 0     | 11273 | 11158 | 11322 | 11161 | 12162 | 26023 |
| 872        | S11    | 11273 | 0     | 11216 | 11512 | 11219 | 11889 | 26148 |
| 1054       | S31    | 11158 | 11216 | 0     | 11255 | 3     | 12081 | 25874 |
| 1512       | S34    | 11322 | 11512 | 11255 | 0     | 11258 | 12525 | 25997 |
| 740        | S59    | 11161 | 11219 | 3     | 11258 | 0     | 12084 | 25877 |
| 677        | S63    | 12162 | 11889 | 12081 | 12525 | 12084 | 0     | 26929 |
| 872        | S61    | 26023 | 26148 | 25874 | 25997 | 25877 | 26929 | 0     |

**C**

| Patient ID | Sample | ST  | <i>gapA</i> | <i>infB</i> | <i>mdh</i> | <i>pgi</i> | <i>phoE</i> | <i>rpoB</i> | <i>tonB</i> |
|------------|--------|-----|-------------|-------------|------------|------------|-------------|-------------|-------------|
| 550        | S10    | -   | 9           | ~4          | ~2         | 1          | 1           | 1           | ~27         |
| 872        | S11    | 187 | 23          | 31          | 2          | 1          | 9           | 4           | 23          |
| 1054       | S31    | -   | ~4          | 1           | 2          | 52         | 1           | 1           | 7           |
| 1512       | S34    | 33  | 2           | 3           | 5          | 1          | 12          | 4           | 9           |
| 400        | S49    | -   |             |             |            |            |             |             |             |
| 740        | S59    | 307 | 4           | 1           | 2          | 52         | 1           | 1           | 7           |
| 872        | S61    | -   |             |             |            |            |             |             |             |
| 677        | S63    | 661 | 4           | 3           | 1          | 36         | 9           | 10          | 14          |

**D**

|                   |            |            |             |            |
|-------------------|------------|------------|-------------|------------|
| <b>Patient ID</b> | <b>301</b> | <b>968</b> | <b>1054</b> | <b>740</b> |
| <b>Sample ID</b>  | <b>KP1</b> | <b>KP2</b> | <b>S31</b>  | <b>S59</b> |
| <b>KP2</b>        | 0          | 5          | 6           | 12         |
| <b>KP1</b>        | 5          | 0          | 14          | 24         |
| <b>S31</b>        | 6          | 14         | 0           | 55         |
| <b>S59</b>        | 12         | 24         | 55          | 0          |

**Supplementary Table 6.** All organisms identified in all respiratory samples processed with clinical metagenomics (above pre-defined thresholds<sup>a</sup>).

| Sample ID | Organisms <sup>b</sup> identified above pre-defined thresholds <sup>a</sup> by respiratory metagenomics                                                                                                                                                                            |
|-----------|------------------------------------------------------------------------------------------------------------------------------------------------------------------------------------------------------------------------------------------------------------------------------------|
| S1        | N/A                                                                                                                                                                                                                                                                                |
| S5        | N/A                                                                                                                                                                                                                                                                                |
| S8        | <i>Candida albicans</i><br><i>Cutibacterium acnes</i><br><i>Cutibacterium acnes</i> HL096PA1<br><i>Moraxella osloensis</i>                                                                                                                                                         |
| S10       | <i>Prevotella denticola</i> F0289<br><i>Prevotella intermedia</i>                                                                                                                                                                                                                  |
| S11       | <i>Candida dubliniensis</i><br><i>Candida albicans</i>                                                                                                                                                                                                                             |
| S14       | N/A                                                                                                                                                                                                                                                                                |
| S16       | <i>Candida ortholipsilosis</i><br><i>S. epidermidis</i><br><i>S. haemolyticus</i> ,<br><i>Lactobacillus paracasei</i><br><i>Lactobacillus casei</i>                                                                                                                                |
| S17       | N/A                                                                                                                                                                                                                                                                                |
| S18       | <i>Candida glabrata</i><br><i>Candida dublinensis</i><br><i>Tannerella forsythia</i><br><i>Olsenella uli</i>                                                                                                                                                                       |
| S19       | <i>C. orthopsilosis</i>                                                                                                                                                                                                                                                            |
| S20       | N/A                                                                                                                                                                                                                                                                                |
| S21       | <i>Candida albicans</i><br><i>Candida glabrata</i><br><i>Enterobacter hormaechei</i> subsp. <i>oharae</i> ,<br><i>Enterobacter hormaechei</i> subsp. <i>steigerwaltii</i>                                                                                                          |
| S25       | N/A                                                                                                                                                                                                                                                                                |
| S27       | <i>Cutibacterium acnes</i> HL096PA1<br><i>Cutibacterium acnes</i> KPA171202<br><i>Escherichia coli</i> 'BL21-Gold(DE3)pLysS AG'<br><i>Arthrobacter</i> sp. IHBB 11108<br><i>Bacillus subtilis</i> BEST7003<br><i>Jonesia denitrificans</i> DSM 20603<br><i>Moraxella osloensis</i> |
| S28       | <i>Candida albicans</i><br><i>E. faecium</i><br><i>Staphylococcus epidermidis</i><br><i>Staphylococcus epidermidis</i> ATCC 12228<br><i>Staphylococcus haemolyticus</i> JCSC1435<br><i>Staphylococcus haemolyticus</i>                                                             |
| S29       | <i>Cutibacterium acnes</i><br><i>Bacillus subtilis</i> BEST7003<br><i>Arthrobacter</i> sp. IHBB 11108<br><i>Moraxella osloensis</i><br><i>Mucilaginibacter</i> sp. PAMC 26640<br><i>Haemophilus parainfluenzae</i> T3T1                                                            |
| S30       | N/A                                                                                                                                                                                                                                                                                |
| S31       | N/A                                                                                                                                                                                                                                                                                |
| S33       | <i>Escherichia coli</i> 'BL21-Gold(DE3)pLysS AG'<br><i>Escherichia coli</i>                                                                                                                                                                                                        |

|     |                                                                                                                                                                                                                                                                                                                                                                                                                                                |
|-----|------------------------------------------------------------------------------------------------------------------------------------------------------------------------------------------------------------------------------------------------------------------------------------------------------------------------------------------------------------------------------------------------------------------------------------------------|
|     | <p><i>Cutibacterium acnes</i><br/> <i>Atopobium parvulum</i> DSM 204699<br/> <i>Arthrobacter</i> sp. IHBB 11108<br/> <i>Bacillus subtilis</i> BEST7003<br/> <i>Moraxella osloensis</i></p>                                                                                                                                                                                                                                                     |
| S34 | <p><i>Candida albicans</i><br/> <i>Streptococcus oralis</i><br/> <i>Streptococcus oralis</i> Uo5<br/> <i>Prevotella melaninogenica</i><br/> <i>Prevotella</i> sp. oral taxon 299 str. F0039</p>                                                                                                                                                                                                                                                |
| S35 | <p><i>Acinetobacter pittii</i>,<br/> <i>Acinetobacter johnsonii</i> XBB1<br/> <i>Acinetobacter</i> sp. TTH0-4<br/> <i>Acinetobacter schindleri</i><br/> <i>Acinetobacter</i> sp. NCu2D-2<br/> <i>Acinetobacter nosocomialis</i><br/> <i>Acinetobacter haemolyticus</i></p>                                                                                                                                                                     |
| S36 | N/A                                                                                                                                                                                                                                                                                                                                                                                                                                            |
| S37 | <p><i>Neisseria sicca</i><br/> <i>Neisseria elongata</i> subsp. <i>glycolytica</i> ATCC 29315</p>                                                                                                                                                                                                                                                                                                                                              |
| S39 | N/A                                                                                                                                                                                                                                                                                                                                                                                                                                            |
| S40 | N/A                                                                                                                                                                                                                                                                                                                                                                                                                                            |
| S41 | <p><i>Candida albicans</i><br/> <i>Eikenella corrodens</i>,<br/> <i>Streptococcus constellatus</i> subsp. <i>pharyngis</i><br/> <i>Streptococcus anginosus</i> C238<br/> <i>Streptococcus anginosus</i> subsp. <i>whileyi</i> MAS624<br/> <i>Streptococcus intermedius</i> JTH08<br/> <i>Staphylococcus epidermidis</i><br/> <i>Prevotella melaninogenica</i><br/> <i>Prevotella intermedia</i><br/> <i>Rothia dentocariosa</i> ATCC 17931</p> |
| S42 | <p><i>Burkholderia thailandensis</i><br/> <i>Burkholderia thailandensis</i> 2002721643<br/> <i>Burkholderia pseudomallei</i></p>                                                                                                                                                                                                                                                                                                               |
| S44 | N/A                                                                                                                                                                                                                                                                                                                                                                                                                                            |
| S45 | <p><i>Corynebacterium simulans</i><br/> <i>Corynebacterium resistens</i> DSM 45100</p>                                                                                                                                                                                                                                                                                                                                                         |
| S46 | <i>Cutibacterium acnes</i>                                                                                                                                                                                                                                                                                                                                                                                                                     |
| S49 | <p><i>Candida albicans</i><br/> <i>Streptococcus sanguinis</i> SK36<br/> <i>Bacillus subtilis</i> BEST7003<br/> <i>Arthrobacter</i> sp. IHBB 11108<br/> <i>Staphylococcus epidermidis</i><br/> <i>Enterococcus faecium</i><br/> <i>Cutibacterium acnes</i><br/> <i>Mucilaginibacter</i> sp. PAMC 26640</p>                                                                                                                                     |
| S51 | N/A                                                                                                                                                                                                                                                                                                                                                                                                                                            |
| S52 | <p><i>Corynebacterium simulans</i><br/> <i>Candida albicans</i></p>                                                                                                                                                                                                                                                                                                                                                                            |
| S53 | N/A                                                                                                                                                                                                                                                                                                                                                                                                                                            |
| S54 | <p><i>Corynebacterium simulans</i>,<br/> <i>Corynebacterium resistens</i> DSM 45100<br/> <i>Cutibacterium acnes</i><br/> <i>Corynebacterium aurimucosum</i> ATCC 700975<br/> <i>Corynebacterium resistens</i> DSM 45100</p>                                                                                                                                                                                                                    |
| S55 | <i>Sphingomonas</i> sp. LK11                                                                                                                                                                                                                                                                                                                                                                                                                   |

|     |                                                                                                                                                                                                                                                                                                                                                                                                                                            |
|-----|--------------------------------------------------------------------------------------------------------------------------------------------------------------------------------------------------------------------------------------------------------------------------------------------------------------------------------------------------------------------------------------------------------------------------------------------|
| S56 | <i>E. faecium</i>                                                                                                                                                                                                                                                                                                                                                                                                                          |
| S59 | <i>Corynebacterium simulans</i>                                                                                                                                                                                                                                                                                                                                                                                                            |
| S61 | N/A                                                                                                                                                                                                                                                                                                                                                                                                                                        |
| S62 | <i>Corynebacterium simulans</i><br><i>Arthrobacter sp.</i> IHBB 11108<br><i>Bacillus subtilis</i> BEST7003<br><i>Staphylococcus epidermidis</i><br><i>Mucilaginibacter sp.</i> PAMC 26640<br><i>Corynebacterium kroppenstedtii</i> DSM 44385<br><i>Cutibacterium acnes</i>                                                                                                                                                                 |
| S63 | <i>Corynebacterium simulans</i><br><i>Corynebacterium aurimucosum</i> ATCC 700975<br><i>Corynebacterium resistens</i> DSM 45100                                                                                                                                                                                                                                                                                                            |
| S64 | <i>Candida albicans</i><br><i>Prevotella melaninogenica</i> ,<br><i>Streptococcus gordonii</i> ,<br><i>Streptococcus gordonii str. challis</i> substr. CH1<br><i>Actinomyces pacaensis</i><br><i>Prevotella intermedia</i><br><i>Fusobacterium nucleatum subsp. vincentii</i><br><i>Prevotella fusca</i> JCM 17724,<br><i>Parabacteroides sp.</i> CT06,<br><i>Porphyromonas gingivalis</i>                                                 |
| S65 | <i>Candida albicans</i><br><i>Prevotella melaninogenica</i><br><i>Atopobium parvulum</i> DSM 20469,<br><i>Streptococcus oralis</i><br><i>Streptococcus oralis subsp. tigurinus</i><br><i>Prevotella intermedia</i><br><i>Fusobacterium nucleatum subsp. vincentii</i> ,<br><i>Fusobacterium nucleatum subsp. vincentii</i> 3_1_36A2<br><i>Streptococcus gordonii</i><br><i>Porphyromonas gingivalis</i><br><i>Parabacteroides sp.</i> CT06 |

<sup>a</sup>pre-defined thresholds are:  $\geq 1\%$  microbial classified,  $\geq 2504$  alignment score and barcode cross-talk rule. <sup>b</sup>Not defined as pathogenic organisms in this study
